# Supplementary material
Source: publisher figshare collection journal article supplement (https://springernature.figshare.com/ndownloader/files/14353478)
Supplement: Supplementary file [file 14353478]

**Additional table 1. Comparison of patients' characteristics with and without serum Mg measurement.**

| Characteristics                       | All patients<br>(n=2862) | Unmeasured<br>(n=2542) | Measured<br>(n=320) | <i>P</i> value |
|---------------------------------------|--------------------------|------------------------|---------------------|----------------|
| Female                                | 1600 (56)                | 1464 (58)              | 176 (55)            | 0.377          |
| Age (years)                           | 66 [20–104]              | 66 [20–104]            | 42 [20–95]          | 0.709          |
| Body weight (kg)                      | 55.6 [26.0–123.4]        | 55.7 [26.4–123.4]      | 54.3 [26.0–101.2]   | 0.201          |
| eGFR (mL/min)                         | 75.7 [3.4–158.4]         | 75.9 [3.5–158.4]       | 75.1 [3.4–145.4]    | 0.493          |
| BUN (mg/dL)                           | 14.8 [2.5–189.8]         | 14.3 [2.5–104.2]       | 23.4 [6.2–189.8]    | <0.001         |
| MgO dose (mg/day)                     | 990 [330–2970]           | 990 [330–2970]         | 990 [330–2970]      | 0.042          |
| Duration of MgO administration (days) | 21 [1–348]               | 20 [1–364]             | 52 [1–348]          | <0.001         |
| Co-administrated drugs                |                          |                        |                     |                |
| PPIs                                  | 1303 (45)                | 1170 (46)              | 133 (46)            | 0.131          |
| Famotidine                            | 102 (6)                  | 143 (5)                | 19 (6)              | 0.820          |
| VD <sub>3</sub> drugs                 | 204 (7)                  | 181 (7)                | 23 (7)              | 0.965          |

Values are presented as median [range] or number (%).

*BUN* blood urea nitrogen, *eGFR* estimated glomerular filtration rate, *MgO* magnesium oxide, *PPIs* proton pump inhibitors,

*VD<sub>3</sub>* vitamin D<sub>3</sub>. Statistical analyses were performed using chi-square test or Mann-Whitney U-test.
